# Supplementary material
Source: HighWire-hosted journal article supplement (doi:10.1101/rna.078994.121)
Supplement: Supplemental_Material.docx [file Supplemental_Material.docx]

Supplementary Materials for

**The rRNA modifying enzyme Tsr3 coordinates the activity of the Rio1 and Rio2 kinases during 40S ribosome assembly**

Haina Huang1,2, Melissa Parker1,2, Katrin Karbstein1,2,3*

*Correspondence: [kkarbst@scripps.edu](mailto:kkarbst@scripps.edu)

This file includes:

Figures: S1 to S4

Tables: S1 to S4

Figure S1.


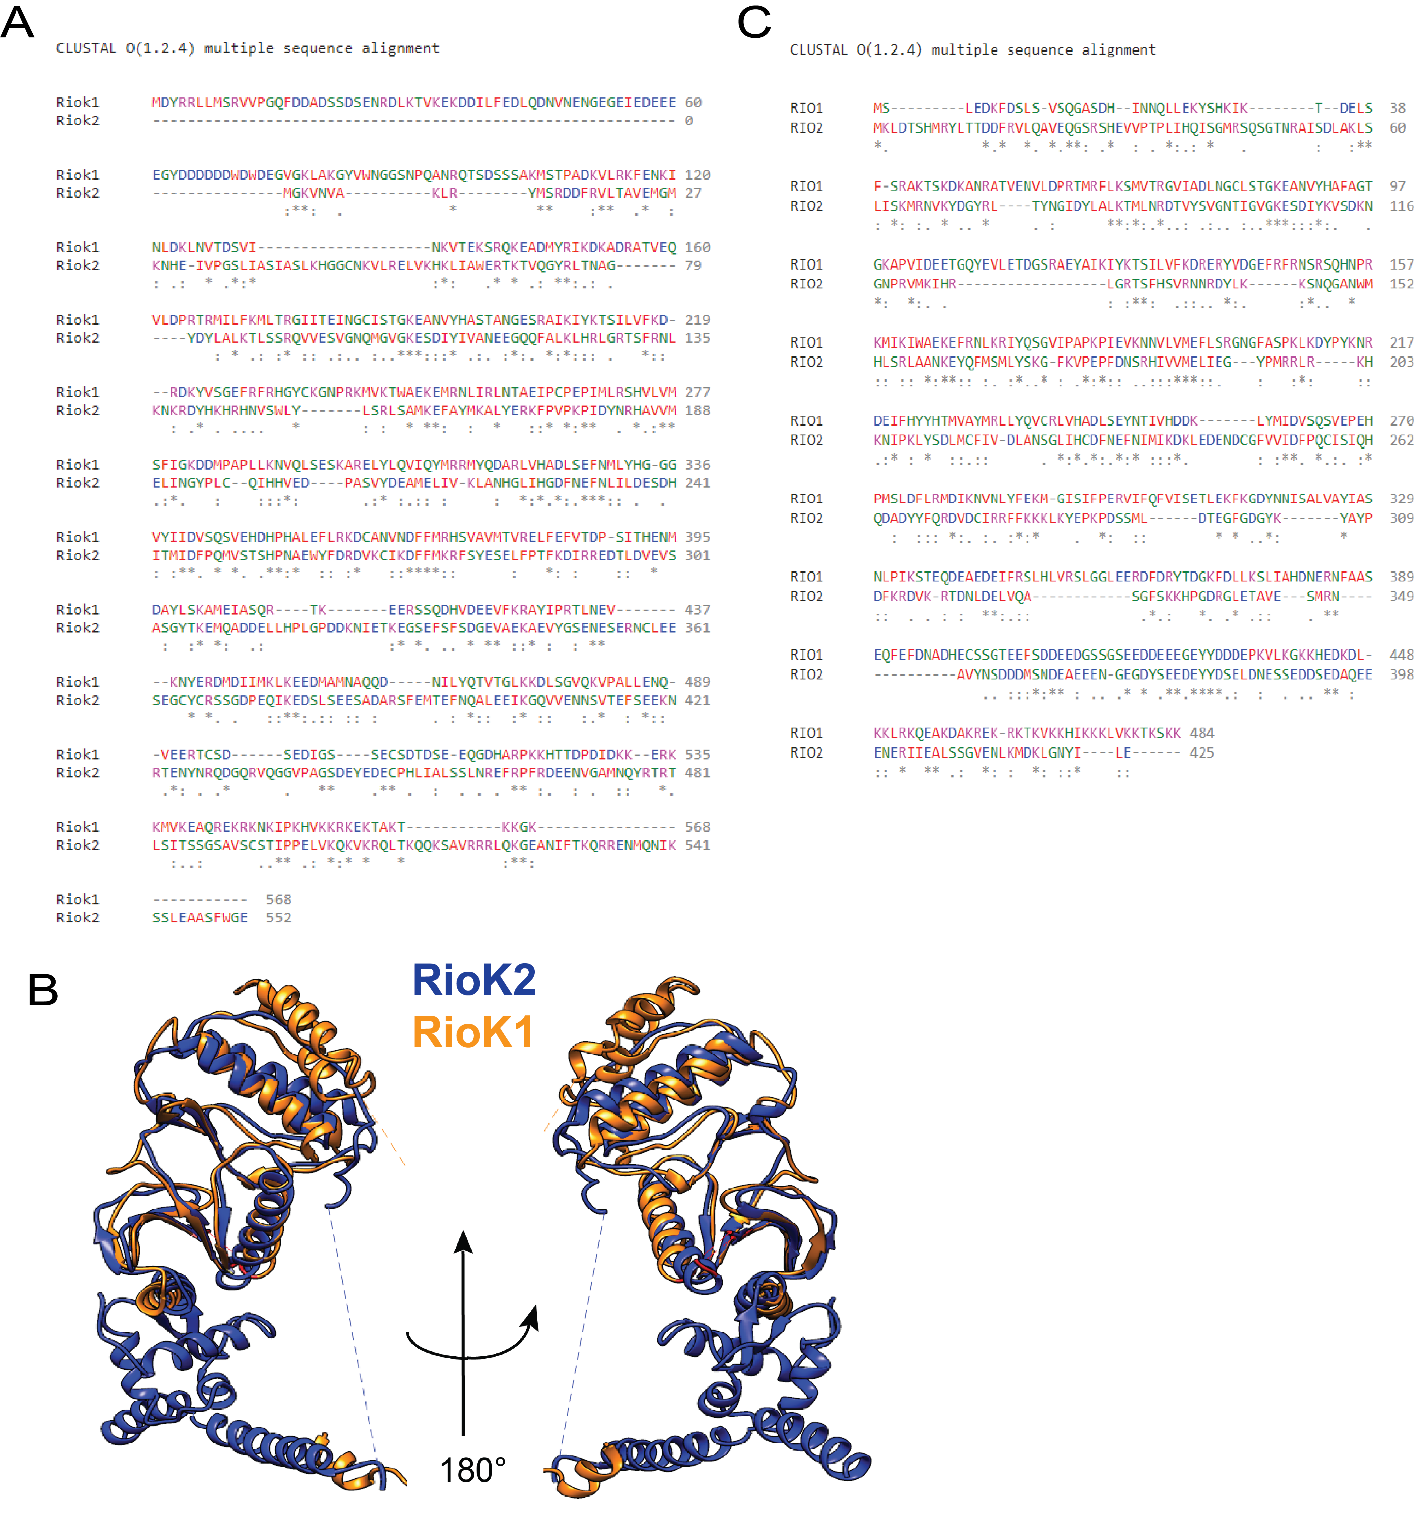


**Figure S1. Rio1 and Rio2 are highly homologous.**

1. Sequence alignment of human Rio1 (RioK1) and Rio2 (RioK2) obtained from NCBI RefSeq (<https://www.ncbi.nlm.nih.gov/refseq/>) using Clustal Omega.
2. Structure overlay of human Rio1 (PDBID 6ZXE chain z) and Rio2 (PDBID 6G18 chain v) using the Needleman-Wunsch algorithm.
3. Sequence alignment of *Saccharomyces cerevisiae* Rio1 and Rio2 obtained from the *Saccharomyces* Genome database (https://www.yeastgenome.org) using Clustal Omega.

Figure S2.


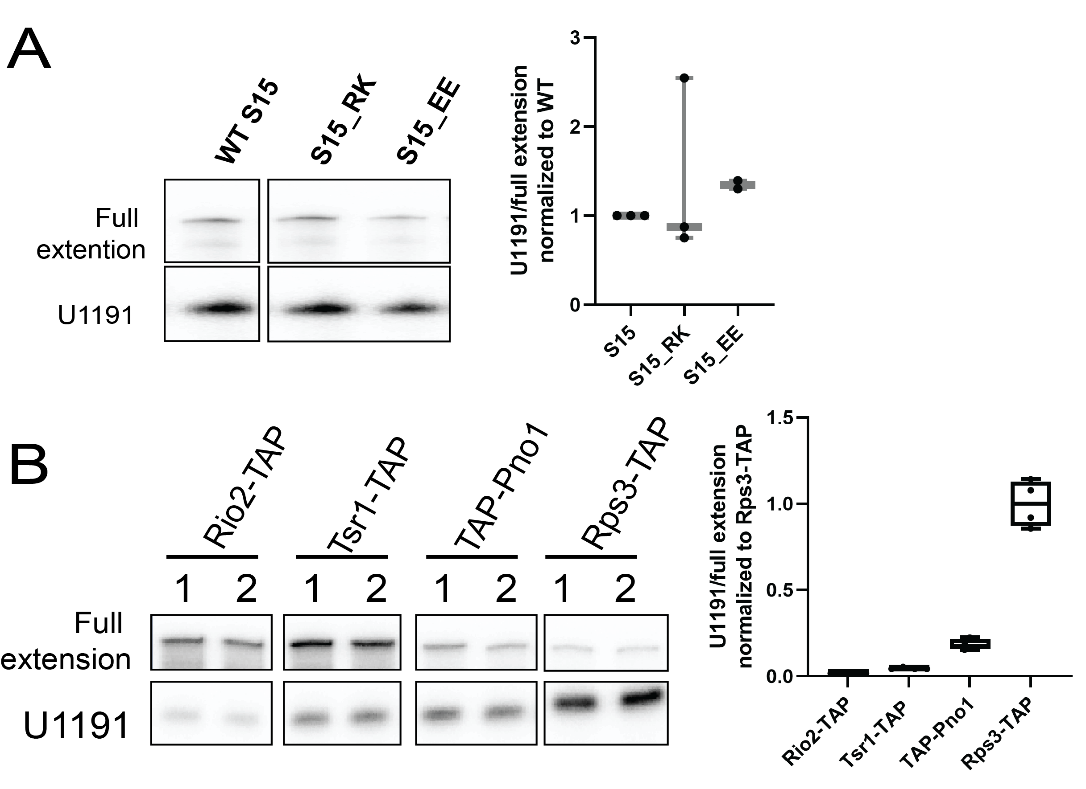


**Figure S2. Acp modification of mutant 40S ribosomes and assembly intermediates.**

1. (Left) Primer extension results show acp modification at U1191 of ribosomes from Gal:S15 cells supplemented with WT S15 or S15_RK or S15_EE plasmid and grown in glucose. (Right) Quantifications of the U1191 signal normalized to the full extension from the data on the left and additional replicates. n2.
2. (Left) Primer extension results indicating the installation of acp modification at U1191 in different purified pre-40S intermediates and mature 40S. Note that results for Rps3-TAP are identical to those in Figure 1E, and shown here for direct comparison. Signal for U1191 was first normalized to full extension before further normalization to mature 40S (Rps3-TAP). 2 representative biological replicates (1, 2) are shown for each cell type. (Right) Quantification of the normalized U1191 stop from the left and two additional replicates (n=4).

Figure S3.


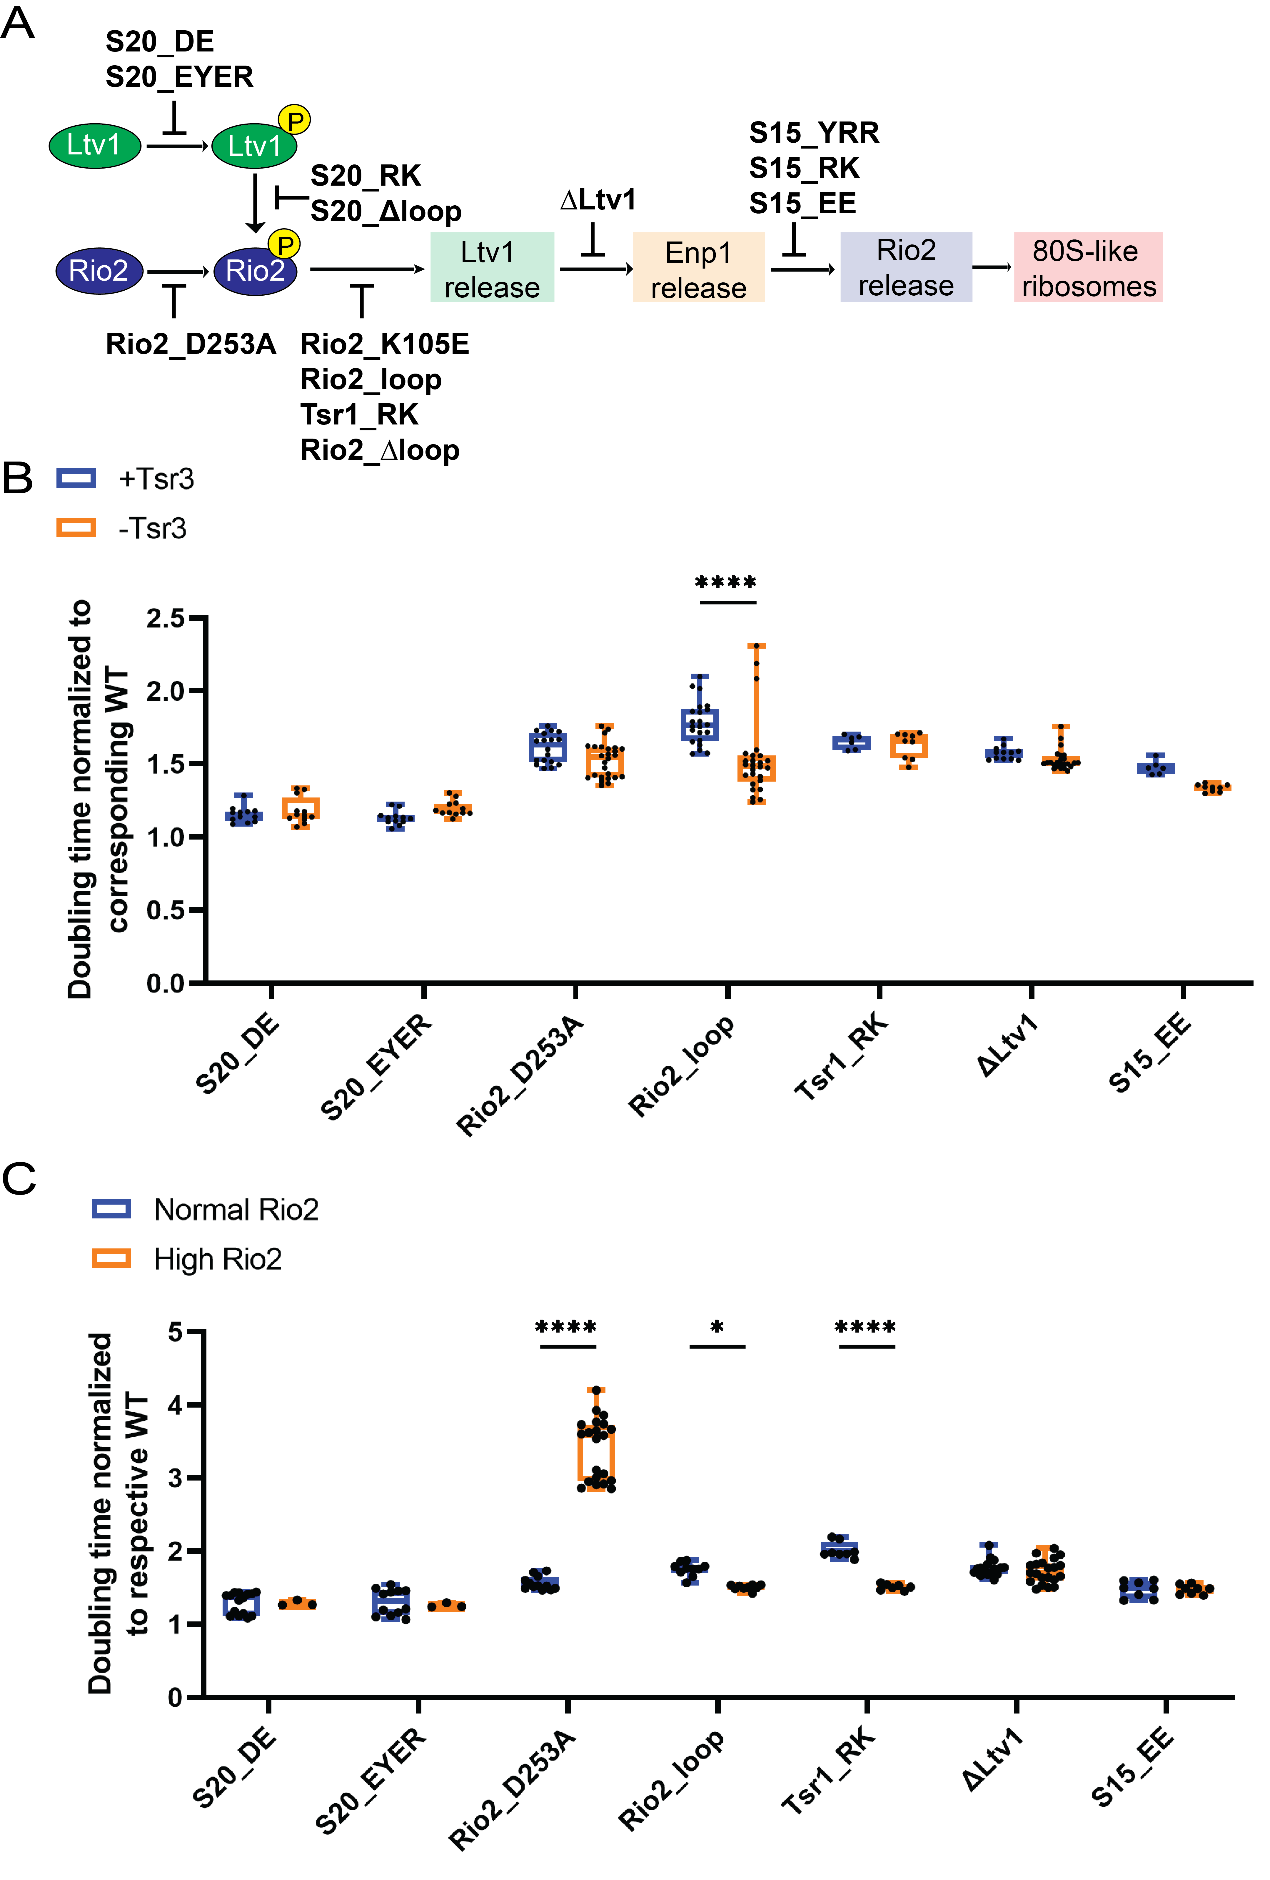


**Figure S3. Synthetic sick effects from ΔTsr3 are specific for mutants affecting Rio2 release.**

1. Scheme showing where within the ordered release of Ltv1, Enp1 and Rio2 during 80S-like ribosome formation the indicated mutants block the process(Huang et al., 2020). Note that the mutations deleted in Rio2_Δloop are mutated in Rio2_loop (see **Table S2**).
2. Normalized doubling times of yeast cells encoding WT S20/S20_DE/S20_EYER, WT Rio2/Rio2_D253A/Rio2_loop, and WT Tsr1/Tsr1_RK, WT S15/S15_EE in the presence and absence of Tsr3. WT or mutant proteins were expressed from plasmids in strains where the endogenous protein is under the GAL-promoter and depleted by growth in glucose. BY4741(WT), ΔLtv1, ΔTsr3 and ΔLtv1ΔTsr3 cells were used to test the genetic interactions between ΔLtv1 and ΔTsr3. Shown in the figure are doubling times of mutants normalized to corresponding WT protein in the same Tsr3 background. Significance was tested using a two-way ANOVA test. ****, padj<0.0001. n≥6.
3. Normalized doubling times of yeast cells encoding WT S20/S20_DE/S20_EYER, WT Rio2/Rio2_D253A/Rio2_loop, and WT Tsr1/Tsr1_RK, WT Ltv1 or empty vector and WT S15/S15_EE with normal and overexpressed Rio2. WT or mutant proteins were expressed from plasmids in strains where the endogenous protein is under the GAL-promoter and depleted by growth in glucose. Shown in the figure are doubling times of mutants normalized to corresponding WT protein in the same Tsr3 background. Significance was tested using a two-way ANOVA test. ****, padj<0.0001. n≥3.

Figure S4.


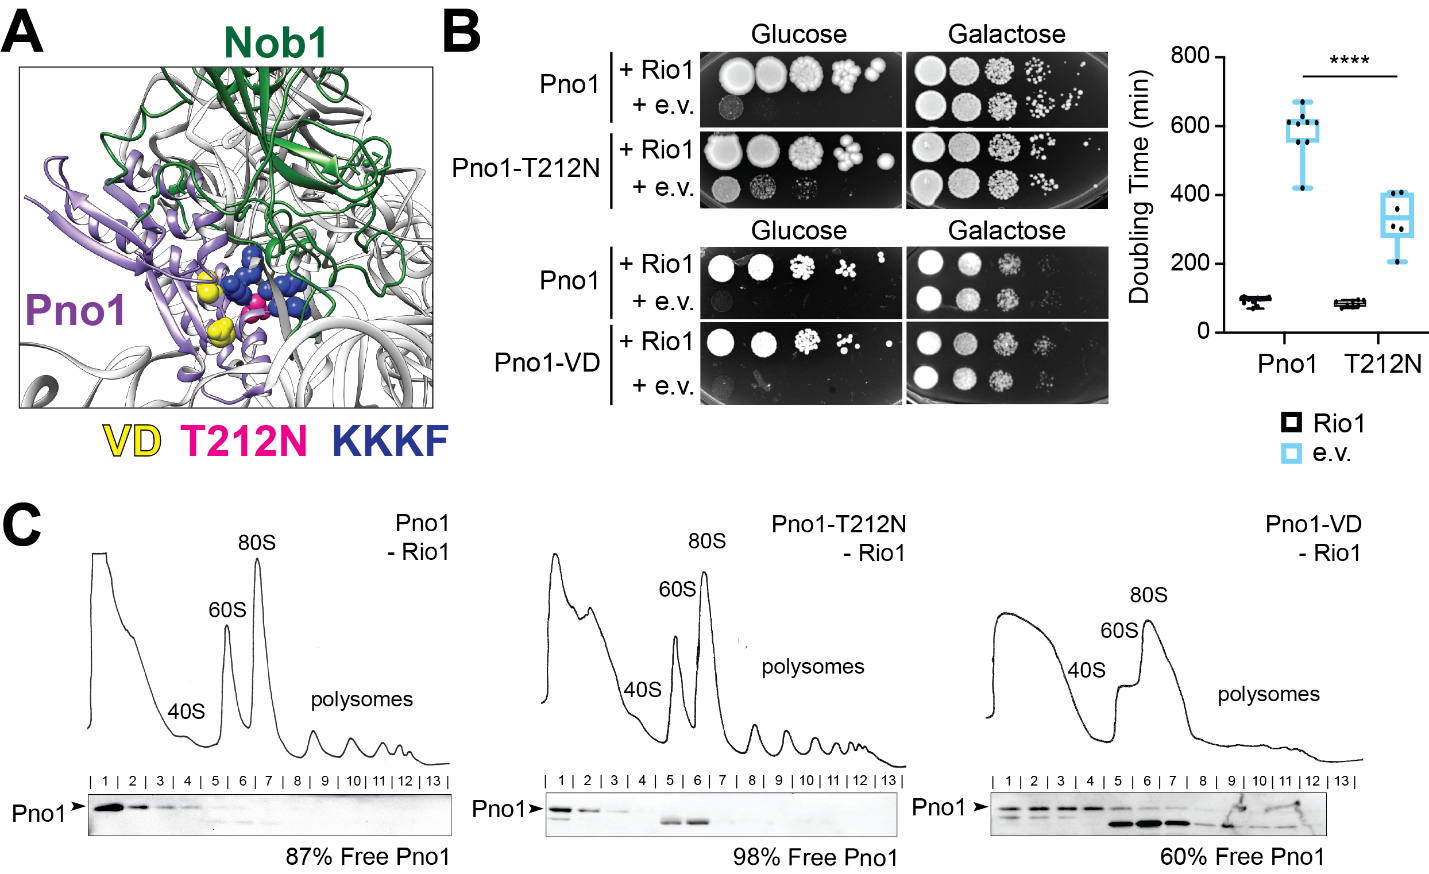


**Figure S4. The dissociation of Tsr3 is required for accommodation of Rio1 in 80S-like ribosomes.**

1. Composite structure of *S. cerevisiae* pre-40S ribosomal rRNA (grey) bound to Pno1 (S.c., PDBID: 6FAI, purple) and Nob1 (H.s., PDB ID: 6ZXE, green). The overlay was generated based on Pno1.Ribosomal proteins were omitted for clarity. Mutations in Pno1 are shown in colored spheres: K208E/K211E/K213E/F214A (KKKF) is a weakly binding mutation shown in dark blue, T212N is a weakly binding mutant shown in pink, and V225A/D228N (VD) is not weakly binding and shown in yellow.
2. (Left) Growth of Gal:Pno1,Gal::Rio1 cells expressing either wild type (WT) Pno1, Pno1-T212N, or Pno1-VD and either an empty vector (e.v.) or Rio1 was compared by 10-fold serial dilutions on minimal glucose or galactose plates. (Right) Doubling times of Gal:Pno1,Gal:Rio1 cells expressing either WT Pno1 or Pno1-T212N and in the presence (black) or absence of Rio1 (blue). ****p<0.0001 by one-way ANOVA test.
3. 10%-50% sucrose gradients of lysates from cells depleted of Rio1 and expressing WT Pno1 (left), Pno1-T212N (middle), or Pno1-VD (right) encoded on plasmids. The endogenous Pno1 protein, transcribed from a GAL-promoter, is depleted by growth in glucose. Shown below the absorbance profiles at 254 nm are Western blots probing for Pno1. Arrowhead notes the upper band corresponding to Pno1. The percentage of Pno1 that is not bound to ribosomes is listed below the gradients.

**Table S1: Yeast strains used in this study**

| **Strains** | **Description** | **Genotype** | **Reference** |
| --- | --- | --- | --- |
| YKK200 | BY4741 | MATa His3-1 Leu2-0 Met15-0 Ura3-0) | Open Biosystems |
| YKK218 | Gal:Fap7 | BY4741, Gal:Fap7(KAN) | (Strunk et al., 2011) |
| YKK1387 | ΔTsr3, Gal:Fap7 | BY4741, ΔTsr3 (KAN), Gal:Fap7 (HYG) | This work |
| YKK1141 | Rio2-TAP, Gal:Tsr1, Gal:S15 | BY4741, Rio2-TAP, Gal:Tsr1(KAN), Gal:S15(NAT) | This work |
| YKK96 | Tsr1-TAP | BY4741, Tsr1-TAP (HIS) | Open Biosystems |
| YKK731 | Tsr1-TAP,Gal:Fap7 | BY4741, Tsr1-TAP (HIS), Gal:Fap7 (NAT) | (Ghalei et al., 2017) |
| YKK988 | Gal:Pno1,Gal:Rio1 | BY4741, Gal:Pno1 (KAN), Gal:Rio1 (NAT) | (Parker et al., 2019) |
| YKK135 | Rps3-TAP | BY4741, Rps3-TAP (HIS) | Open Biosystems |
| YKK1150 | Gal:S15 | BY4741, Gal:S15(NAT) | (Huang et al., 2020) |
| YKK1324 | ΔTsr3 | BY4741, ∆Tsr3(KAN) | This work |
| YKK1181 | Gal:Rio2 | BY4741, Gal:Rio2(KAN) | (Huang et al., 2020) |
| YKK1399 | ΔTsr3, Gal:Rio2 | BY4741, ∆Tsr3(KAN),Gal:Rio2(NAT) | This work |
| YKK730 | Gal:S20 | BY4741, Gal:Rps20 (HYG) | (Collins et al., 2018) |
| YKK1398 | ΔTsr3, Gal:S20 | BY4741, ∆Tsr3(KAN),Gal:S20(HYG) | This work |
| YKK1396 | ΔTsr3, Gal:S15 | BY4741, ∆Tsr3(KAN),Gal:S15(NAT) | This work |
| YKK1201 | Gal:Rio2, Gal:S20 | BY4741, Gal:S20(HYG),Gal:Rio2(NAT) | (Huang et al., 2020) |
| YKK1183 | Gal:Rio2, Gal:S15 | BY4741, Gal:Rio2(KAN),Gal:S15(NAT) | (Huang et al., 2020) |
| YKK1492 | ΔTsr3, Gal:Pno1 | BY4741, ΔTsr3(KAN),Gal:Pno1(HYG) | This work |
| YKK1397 | ΔTsr3, Gal:Tsr1 | BY4741, ∆Tsr3(KAN),Gal:Tsr1(NAT) | This work |
| YKK73 | ΔLtv1 | BY4741, ΔLtv1(KAN) | (Strunk et al., 2011) |
| YKK1385 | ΔTsr3, ΔLtv1 | BY4741, ∆Tsr3(KAN), ∆Ltv1(NAT) | This work |
| YKK1190 | Gal:Rio2, ΔLtv1 | BY4741, Gal:Rio2(KAN), ∆Ltv1(HYG) | (Huang et al., 2020) |
| YKK1184 | Gal:Rio2, Gal:Tsr1 | BY4741, Gal:Rio2(KAN),Gal:Tsr1(NAT) | (Huang et al., 2020) |
| YKK493 | Gal:S3 | BY4741, Gal:Rps3 (KAN) | (Collins et al., 2018) |
| YKK1557 | Tsr1-TAP, ΔTsr3, Gal:Fap7 | BY4741, Tsr1-TAP (HIS), ΔTsr3 (KAN), Gal:Fap7(HYG) | This work |

**Table S2: Plasmids used in this study**

| **Plasmid** | **Description** | **Vector** | **Reference** | **Detailed description** |
| --- | --- | --- | --- | --- |
| PKK30116 | WT S15 | TEF 416 | (Huang et al., 2020) |  |
| PKK30180 | S15_YRR | Y123I,R127K,R130K |
| PKK30181 | S15_RK | R137E,K142E |
| PKK30394 | S15_EE | E110K,E118K |
| PKK30130 | WT Fap7 | 415 | This work | Endogenous promoter/terminator |
| PKK30157 | TAP-Pno1 | TEF 413 | (Parker et al., 2019) |  |
| PKK30696 | WT Tsr3 | TEF 413 | This work |  |
| PKK30711 | Tsr3_W114A |  |
| PKK30801 | Tsr3_R131A |  |
| PKK30802 | Tsr3_RK | R60A,K65A |
| PKK30807 | Tsr3_RK/R131A | R60A,K65A,R131A |
| PKK30803 | Tsr3_W114A/R131A |  |
| PKK30804 | Tsr3_W114A/RK | R60A,K65A,W114A |
| PKK30808 | Tsr3_W114A/R131A/RK | R60A,K65A,R131A,W114A |
| PKK30156 | WT Rio1 | TEF 415 | (Parker et al., 2019) |  |
| PKK3313 | WT Rio1 | CYC1 415 |  |
| PKK3350 | WT Rio2 | TEF 413 | (Huang et al., 2020) |  |
| PKK3795 | Rio2_K105E | K105E; see also (Ferreira-Cerca et al., 2012) |
| PKK3452 | Rio2_D253A | D253A; see also (Ferreira-Cerca et al., 2012) |
| PKK30356 | Rio2_loop | R129A, H133A, R136A, R139A, D140A, K143A, K144A; see also (Ferreira-Cerca et al., 2012) |
| PKK30332 | Rio2_RQQR | R17E,Q20E,Q24E,R27E |
| PKK30354 | Rio2_Δloop | (Huang and Karbstein, 2021) | Deletion of amino acids 129-146. |
| PKK30208 | WT Rio2 | CYC1 415 | (Huang et al., 2020) |  |
| PKK30348 | Rio2_loop | See PKK 30356 |
| PKK30211 | Rio2_K105E |  |
| PKK30253 | Rio2_D253A |  |
| PKK30369 | Rio2_Δloop | (Huang and Karbstein, 2021) | See PKK30354 |
| PKK3890 | WT S20 | TEF 415 | (Collins et al., 2018) |  |
| PKK3934 | S20_DE | TEF 415 | D113K,E115K |
| PKK3891 | S20_EYER | TEF 415 | E80K,Y82A,E83K,R85E |
| PKK30302 | S20_RK | TEF 415 | (Huang et al., 2020) | R68E,K69E; see also (Mitterer et al., 2019) |
| PKK30303 | S20_Δloop | TEF 415 | Substitution of residues 68 to 78 and with GG; see also (Mitterer et al., 2019) |
| PKK30224 | WT Pno1 | TEF 415 | (Johnson et al., 2017) |  |
| PKK30225 | Pno1_KKKF | K208E, K211E, K213E, F214A |
| PKK30226 | WT Pno1 | CYC1 415 | This work |  |
| PKK30817 | Pno1_T212N |  |
| PKK30818 | Pno1_VD | V225A,D228N |
| PKK 3270 | WT Pno1 | TEF 416 | This work |  |
| PKK30620 | Pno1_T212N |  |
| PKK30438 | Pno1_VD | See PKK30818 |
| PKK30183 | WT Tsr1 | TEF 415 | (Huang et al., 2020) |  |
| PKK3295 | WT Tsr1 | TEF 416 |  |
| PKK3716 | Tsr1_RK | TEF 416 | R709E,K712E |
| PKK3606 | WT Ltv1 | TEF 413 | (Ghalei et al., 2015) |  |
| PKK3521 | WT S3 | TEF 416 | (Collins et al., 2018) |  |
| PKK3933 | S3_KK | TEF 416 | S3_K7D,K10E |
| PKK3001 | WT Fap7 | CYC1 415 | (Ghalei et al., 2017) |  |
| PKK3003 | Fap7_G19S |  |
| PKK3075 | Fap7_K20R |  |

**Table S3: Yeast strains and plasmids used in each Figure.**

| **Figure** | **Yeast strains** | **Plasmids** | **Vectors** |
| --- | --- | --- | --- |
| Figure 1C, 3G | Gal:Fap7 | / | / |
| ΔTsr3, Gal:Fap7 | / | / |
| Figure 1E, S2B | Rio2-TAP, Gal:Tsr1, Gal:S15 | Tsr1 & S15 | TEF 415 & TEF 416 |
| Tsr1 & S15_RK |
| Tsr1-TAP | / | / |
| Tsr1-TAP,Gal:Fap7 | / | / |
| Gal:Pno1,Gal:Rio1 | TAP-Pno1+ Rio1 | TEF 413 & TEF 415 |
| TAP-Pno1+ empty vector |
| Rps3-TAP | / | / |
| Figure 2B | Gal:S15 | WT S15 + empty vector | TEF 416 & TEF 413 |
| S15_YRR+ empty vector |
| WT S15 + Tsr3 |
| S15_YRR+ Tsr3 |
| Figure 2C | Gal:S3 | WT S3 + empty vector | TEF 416 & TEF 413 |
| S3_KK + empty vector |
| WT S3 + Tsr3 |
| S3_KK + Tsr3 |
| Figure 3A & S3B | Gal:Rio2 or ΔTsr3, Gal:Rio2 | WT Rio2 | CYC1 415 |
| Rio2_K105E |
| Rio2_D253A |
| Rio2_loop |
| Rio2_Δloop |
| Gal:S20 or  ΔTsr3, Gal:S20 | WT S20 | TEF 415 |
| S20_DE |
| S20_EYER |
| S20_RK |
| S20_Δloop |
| Gal:S15 or ΔTsr3, Gal:S15 | WT S15 | TEF 416 |
| S15_YRR |
| S15_RK |
| S15_EE |
| Gal:Tsr1 or ΔTsr3, Gal:Tsr1 | WT Tsr1 | TEF 416 |
| Tsr1_RK |
| BY4741 | / | / |
| ΔTsr3 | / | / |
| ΔLtv1 | / | / |
| ΔTsr3, ΔLtv1 | / | / |
| Figure 3D & S3C | Gal:Rio2 | WT Rio2 | TEF 413 |
| Rio2_K105E |
| Rio2_D253A |
| Rio2_loop |
| Rio2_Δloop |
| WT Rio2 | CYC1 415 |
| Rio2_K105E |
| Rio2_D253A |
| Rio2_loop |
| Rio2_Δloop |
| Gal:S20 | WT S20 | TEF 415 |
| S20_RK |
| S20_Δloop |
| S20_DE |
| S20_EYER |
| Gal:S20,Gal:Rio2 | WT S20 + WT Rio2 | TEF 415 & TEF413 |
| S20_RK + WT Rio2 |
| S20_Δloop + WT Rio2 |
| S20_DE + WT Rio2 |
| S20_EYER + WT Rio2 |
| Gal:S15 | WT S15 | TEF 416 |
| S15_YRR |
| S15_RK |
| S15_EE |
| Gal:S15,Gal:Rio2 | WT S15 + WT Rio2 | TEF 416 & TEF413 |
| S15_YRR + WT Rio2 |
| S15_RK + WT Rio2 |
| S15_EE + WT Rio2 |
| Gal:Tsr1,Gal:Rio2 | WT Tsr1 + TEF Rio2 | TEF 416 & TEF413 |
| Tsr1_RK + TEF Rio2 |
| WT Tsr1 + CYC1 Rio2 | TEF 416 & CYC1 415 |
| Tsr1_RK + CYC1 Rio2 |
| Gal:Rio2, ΔLtv1 | TEF Rio2 + WT Ltv1 | TEF 413 & TEF416 |
| TEF Rio2 + empty vector |
| CYC1 Rio2 + WT Ltv1 | CYC1 415 & TEF416 |
| CYC1 Rio2 + empty vector |
| Figure 3E | Gal:Rio2 or ΔTsr3, Gal:Rio2 | WT Rio2 | TEF 413 |
| Rio2_RQQR | TEF 413 |
| WT Rio2 | CYC1 415 |
| Figure 3F | BY4741 | / | / |
| ΔTsr3 | / | / |
| Figure 4A | ΔTsr3 | WT Tsr3 | TEF 413 |
| Empty vector |
| Tsr3_W114A |
| Figure 4B | BY4741 | WT Tsr3 | TEF 413 |
| Tsr3_W114A |
| Figure 4C | ΔTsr3 | WT Tsr3 | TEF 413 |
| Tsr3_W114A |
| Tsr3_R131A |
| Tsr3_RK |
| Tsr3_RK/R131A |
| Tsr3_W114A/R131A |
| Tsr3_W114A/RK |
| Tsr3_W114A/R131A/RK |
| Figure 4D, 5A | ΔTsr3 | HA-Tsr3 | TEF 413 |
| HA-Tsr3_W114A |
| Figure 5B | Tsr1-TAP, ΔTsr3, Gal:Fap7 | HA-Tsr3 | TEF 416 |
| HA-Tsr3_W114A |
| Figure 5C | ΔTsr3, Gal:Pno1 | WT Tsr3 + WT Pno1 | TEF 413 + TEF 415 |
| WT Tsr3 + Pno1_KKKF |
| Tsr3_W114A + WT Pno1 |
| Tsr3_W114A + Pno1_KKKF |
| Figure 5D | ΔTsr3, Gal:Pno1 | WT Tsr3 + WT Pno1 | TEF 413 + CYC1 415 |
| WT Tsr3 + Pno1_T212N |
| WT Tsr3 + Pno1_VD |
| Tsr3_W114A + WT Pno1 |
| Tsr3_W114A + Pno1_T212N |
| Tsr3_W114A + Pno1_VD |
| Figure 6A | BY4741 | / | / |
| ΔTsr3 | / | / |
| Figure 6B | ΔTsr3, Gal:Pno1 | WT Tsr3 + WT Pno1 | TEF 413 & TEF 415 |
| Empty vector + WT Pno1 |
| WT Tsr3 + Pno1_KKKF |
| Empty vector + Pno1_KKKF |
| Figure 6C | ΔTsr3, Gal:S15 | WT Tsr3 + WT S15 | TEF 413 & TEF 416 |
| WT Tsr3 + S15_YRR |
| WT Tsr3 + S15_RK |
| Tsr3_W114A + WT S15 |
| Tsr3_W114A + S15_YRR |
| Tsr3_W114A + S15_RK |
| Figure 6D | ΔTsr3, Gal:Fap7 | WT Tsr3 + WT Fap7 | TEF 413 & CYC1 415 |
| WT Tsr3 + Fap7_G19S |
| WT Tsr3 + Fap7_K20R |
| Tsr3_W114A + WT Fap7 |
| Tsr3_W114A + Fap7_G19S |
| Tsr3_W114A + Fap7_K20R |
| Figure S2A | Gal:S15 | WT S15 | TEF 416 |
| S15_RK |
| S15_EE |
| Figure S4B &S4C | Gal:Pno1,Gal:Rio1 | WT Pno1 + WT Rio1 |  |
| WT Pno1 + empty vector |
| Pno1_T212N + WT Rio1 |
| Pno1_T212N + empty vector |
| Pno1_VD + WT Rio1 |
| Pno1_VD + empty vector |

**Table S4: Oligos used in this study**

| **Description** | **Sequence** | **Reference** |
| --- | --- | --- |
| 18S probe | TCCCCTAACTTTCGTTCTTG | (Strunk et al., 2012) |
| 20S probe | GCT CTC ATG CTC TTG CC |
| 25S probe | GCCCGTTCCCTTGGCTGTG |
| RT probe for acp- modification detection | CCACAAAATCAAGAAAGAGCTCTC | This work |

**References**

Collins, J.C., Ghalei, H., Doherty, J.R., Huang, H., Culver, R.N., and Karbstein, K. (2018). Ribosome biogenesis factor Ltv1 chaperones the assembly of the small subunit head. Journal of Cell Biology *217*, 4141-4154.

Ferreira-Cerca, S., Sagar, V., Schafer, T., Diop, M., Wesseling, A.M., Lu, H.Y., Chai, E., Hurt, E., and LaRonde-LeBlanc, N. (2012). ATPase-dependent role of the atypical kinase Rio2 on the evolving pre-40S ribosomal subunit. Nature Structural & Molecular Biology *19*, 1316-+.

Ghalei, H., Schaub, F.X., Doherty, J.R., Noguchi, Y., Roush, W.R., Cleveland, J.L., Stroupe, M.E., and Karbstein, K. (2015). Hrr25/CK1delta-directed release of Ltv1 from pre-40S ribosomes is necessary for ribosome assembly and cell growth. J Cell Biol *208*, 745-759.

Ghalei, H., Trepreau, J., Collins, J.C., Bhaskaran, H., Strunk, B.S., and Karbstein, K. (2017). The ATPase Fap7 Tests the Ability to Carry Out Translocation-like Conformational Changes and Releases Dim1 during 40S Ribosome Maturation. Mol Cell *67*, 990-1000 e1003.

Huang, H., Ghalei, H., and Karbstein, K. (2020). Quality control of 40S ribosome head assembly ensures scanning competence. Journal of Cell Biology *219*.

Huang, H., and Karbstein, K. (2021). Assembly factors chaperone ribosomal RNA folding by isolating helical junctions that are prone to misfolding. Proceedings of the National Academy of Sciences *118*, e2101164118.

Johnson, M.C., Ghalei, H., Doxtader, K.A., Karbstein, K., and Stroupe, M.E. (2017). Structural Heterogeneity in Pre-40S Ribosomes. Structure *25*, 329-340.

Mitterer, V., Shayan, R., Ferreira-Cerca, S., Murat, G., Enne, T., Rinaldi, D., Weigl, S., Omanic, H., Gleizes, P.E., Kressler, D.*, et al.* (2019). Conformational proofreading of distant 40S ribosomal subunit maturation events by a long-range communication mechanism. Nat Commun *10*, 2754.

Parker, M.D., Collins, J.C., Korona, B., Ghalei, H., and Karbstein, K. (2019). A kinase-dependent checkpoint prevents escape of immature ribosomes into the translating pool. PLoS Biol *17*, e3000329.

Strunk, B.S., Loucks, C.R., Su, M., Vashisth, H., Cheng, S., Schilling, J., Brooks, C.L., 3rd, Karbstein, K., and Skiniotis, G. (2011). Ribosome assembly factors prevent premature translation initiation by 40S assembly intermediates. Science *333*, 1449-1453.

Strunk, B.S., Novak, M.N., Young, C.L., and Karbstein, K. (2012). A translation-like cycle is a quality control checkpoint for maturing 40S ribosome subunits. Cell *150*, 111-121.
